# Supplementary material for: Perforating domed plasmonic films for broadband and omnidirectional antireflection
Source: Royal Society of Chemistry journal article supplement (doi:10.1039/c6nr05104a), 2016-01-01
Supplement: c6nr05104a1.pdf [file c6nr05104a1.pdf]

Supporting information

## Perforating Domed Plasmonic Films for Broadband and Omnidirectional Antireflection

Bin Ai, Panpan Gu, Helmuth Möhwald and Gang Zhang\*

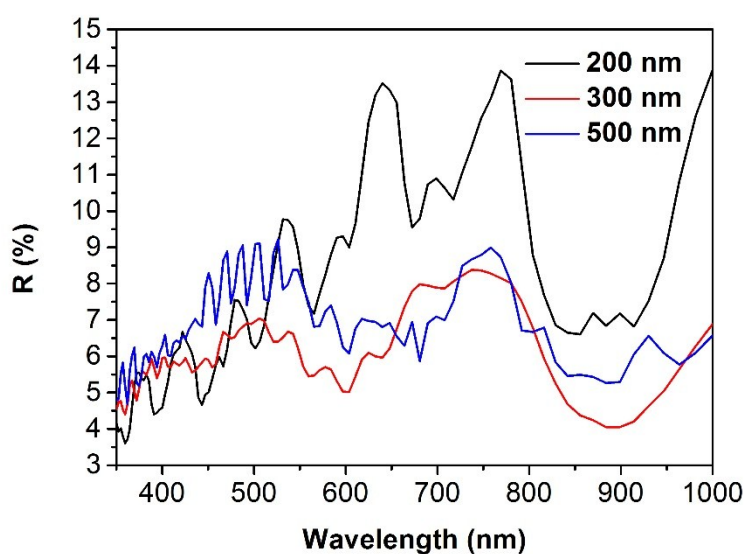

**Figure S1.** Simulation of reflection spectra of domed nano-hole/disk arrays with different period (number of nanoholes).

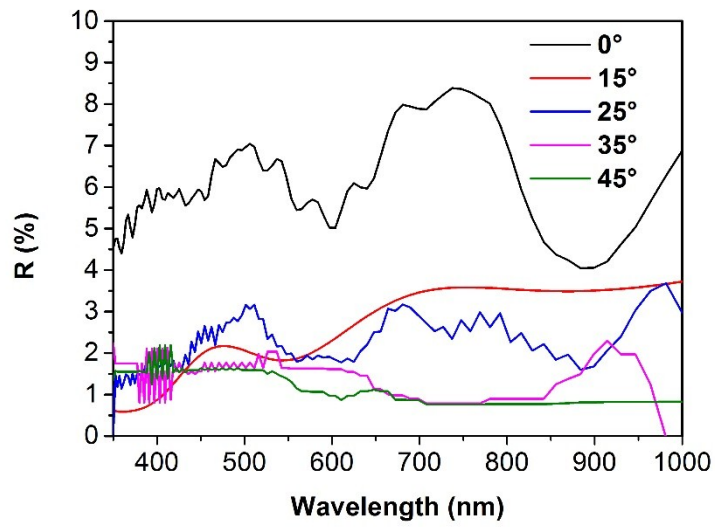

**Figure S2.** Simulation of the reflection spectra of domed nano-hole/disk array at different angles of incidence. The simulation results are in qualitative agreement with the experimental results, yet there exist some deviations. These deviations may be caused by the structure used in the simulations not being perfectly the same as the real structure. Besides, the rough surface is not considered here.
